# Supplementary material for: Effects of Lactiplantibacillus plantarum GUANKE on Diphenoxylate-Induced Slow Transit Constipation and Gut Microbiota in Mice
Source: MDPI journal article supplement (doi:10.3390/nu15173741), 2023-08-26
Supplement: s1 [file s1]

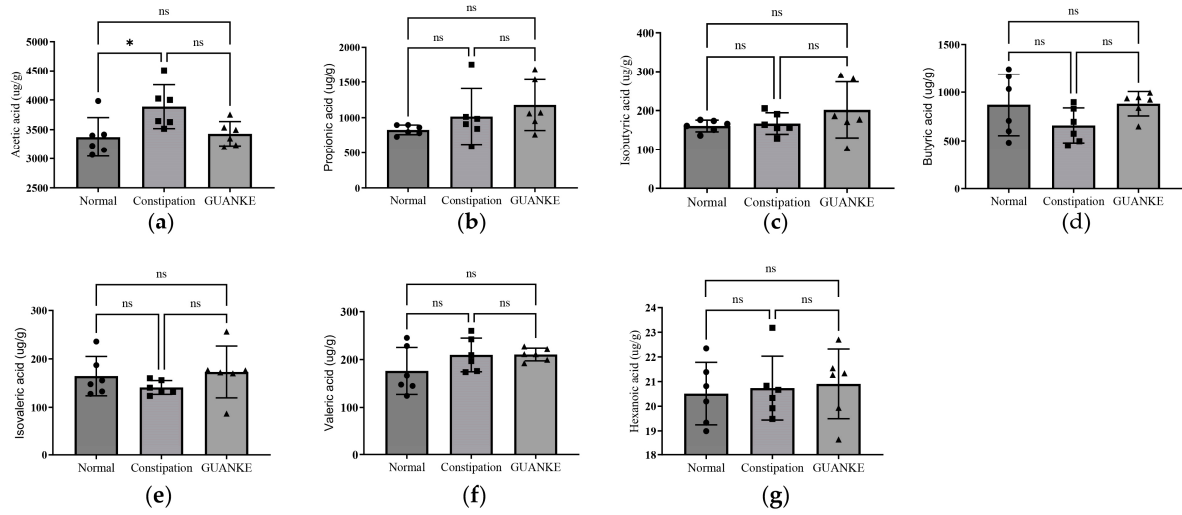

**Figure S1.** Effects of *L. plantarum* GUANKE on SCFA profiles of intestinal factors associated with constipation in mice. (a) Acetic acid; (b) propionic acid; (c) isovaleric acid; (d) butyric acid; (e) isobutyric acid; (f) valeric acid; (g) hexanoic acid. Statistical analysis was performed using one-way ANOVA followed by LSD (least significant difference) for multiple comparisons of groups. \*  $p < 0.05$ , ns = no significant difference ( $p > 0.05$ ).
